# Supplementary material
Source: MDPI journal article supplement (https://www.mdpi.com/2071-1050/7/1/222)
Supplement: s1 [file s1]

## Supplementary Materials

### 1. The Scenarios

**Table S1.** Scenarios.

| Hobart's Scenario | 2015                                                                                     | 2025                                                                                                                             | 2035                                                                                                                    | 2045                                                                                                                                                                       |
|-------------------|------------------------------------------------------------------------------------------|----------------------------------------------------------------------------------------------------------------------------------|-------------------------------------------------------------------------------------------------------------------------|----------------------------------------------------------------------------------------------------------------------------------------------------------------------------|
| <b>H1</b>         | Focus on growth continues.<br>Resources dwindle.<br>Reliant on foreign investment.       | Resource shortages.<br>Serious climate change & environmental degradation. Inequity & intolerance grows.                         | Reduced options for change. Few government services.<br>Growing conflict & violence                                     | Foreign control of resources.<br>Commissioned production only.<br>Feudal slave state.<br>Violent protests & civil unrest threatening.                                      |
| <b>H2</b>         | Adaptation & Sustainability the new focus.<br>Local preferred over global.               | Sustainable energy sources established.<br>Focus on recycling.<br>High quality foods available to all (local & exports).         | Services (e.g., health & education) on a sustainable & accessible footing.<br>Engaged populace using collective wisdom. | Society provides a healthy & safe environment for all.<br>Government is free of vested interests.<br>Population & resource use is sustainable (includes monitoring).       |
| <b>H3</b>         | Move to collaborative consumption.<br>Small business preferred over large                | Ubiquitous quality education. Legislation Encouraging renewable energy.<br>Private sector governance role                        | Space-based resources accessed.<br>Explore new mutualistic technologies (rather than exploitation of nature)            | Local focus (individual & community relationships & leadership). Individual responsibility for minimizing footprint (high levels of self-sufficiency).<br>Healthier aging. |
| <b>H4</b>         | Education in crisis, with low literacy. Vested interests control media.<br>Social unrest | Separation of private sector interests & governance.<br>Focus on accessible, flexible education                                  | Improved health, education, employment.<br>Participatory democracy.<br>Peaceful, respectful, conflict resolution.       | Diversity of aging options. Increased security. Immediacy of information, increased understanding & communication                                                          |
| <b>H5</b>         | Media dominates opinion making.<br>Push for growth.                                      | Vested interests dictate views.<br>Social control.<br>Inequity & declining standards of living. Aged warehoused in institutions. | Civil war or revolution as social & environmental tipping points reached.                                               | Push for transparency.<br>Improved education, awareness & equity.<br>Moving to less reliance on consumption & greater human capital focus.                                 |

Table S1. Cont.

| Melbourne's Scenario | 2015                                                                                                                              | 2025                                                                                                                                                                                                                                            | 2035                                                                                                     | 2045                                                                                                                                                                                  |
|----------------------|-----------------------------------------------------------------------------------------------------------------------------------|-------------------------------------------------------------------------------------------------------------------------------------------------------------------------------------------------------------------------------------------------|----------------------------------------------------------------------------------------------------------|---------------------------------------------------------------------------------------------------------------------------------------------------------------------------------------|
| <b>M1</b>            | Increasing resource use, cost of living & inequity. Social awareness & community integration increases                            | Sustained socioeconomic problems & increasing corporate power. Digital revolution                                                                                                                                                               | Technological breakthroughs in all areas for those who can pay. Space resources exploited                | Severe climate change & environmental degradation. Displacement & war. Large wealth gap & violent class conflict. Corporate & dictatorships. Pandemics. Societal collapse.            |
| <b>M2</b>            | Alternative sources of energy come online. More people work from home                                                             | Increased use of genomics & information technology. Collaborative consumption. Pilot new government model featuring resource sharing, social participation & preventative not reactive planning (e.g., health)                                  |                                                                                                          | High use of social media for interdependent community. Act & own locally. Improved education & well-being. Novel technologies (e.g., houses as resource base, harness extreme events) |
| <b>M3</b>            | Multinational Power increases. Diversity declines & inequality rises                                                              | Multinationals as decision makers, economic interests control infrastructure & government. Environmental degradation, pervasive genetic engineering. Food & health crises. National parks have Disneyesque reputation. Inequity marginalisation |                                                                                                          | Major overcrowding, roster living (sleeping, driving etc). Megacities. Enforced conformity. Australia drops to “developing nation” status                                             |
| <b>M4</b>            | New political structure sees a switch to long-term decision making. Increased resource sharing & social empathy                   | Public consultation to achieve collaborative strategies. Improved environmental & economic outcomes. High diversity. Preventative actions. Reduced isolation, increased efficiency & productivity.                                              |                                                                                                          | Shared successful sustainable solutions. Natural assets woven into global economy. New initiatives improve health, biodiversity & supply of needs                                     |
| <b>M5</b>            | Invest in technologies, infrastructure & education to improve sustainability, support social change. Think of & pursue solutions. | Cleaner, cheaper energy. New industries & technologies. Internet supports Improved learning.                                                                                                                                                    | Crowd-sourced democracy. Transport & infrastructure support liveable cities & community. Virtual tourism | Political stability. Collaborative communities & equity. Good health & services. Diversity supported                                                                                  |

Table S1. Cont.

| Canberra's Scenarios | 2015                                                                                                                                             | 2025                                                                                                                                                                     | 2035                                                                                                                              | 2045                                                                                                                                 |
|----------------------|--------------------------------------------------------------------------------------------------------------------------------------------------|--------------------------------------------------------------------------------------------------------------------------------------------------------------------------|-----------------------------------------------------------------------------------------------------------------------------------|--------------------------------------------------------------------------------------------------------------------------------------|
| C1                   | Increasing regulation & congestion, declining quality of life. Catastrophic events                                                               | Reactionary culture. Life moves online. Racial tension, diminishing resources, loss of Great Barrier Reef drives emergence of new political parties & social conscience. | Changed cultural mix. Consumption constrained. Corporations achieve nation status. Cyber technologies & space colonisation        | Bio- & nanotech based online economy. Personal barcodes. Asian superpower. Climate driven sea-change desire.                         |
| C2                   | Housing pressure, Tightening immigration. Computerised censorship & surveillance. Pandemics                                                      | Universal IDS. Denialism discredited by eco-collapses. Debt driven loss of social safety net                                                                             | Social & political fragmentation (outer suburbs vs cybersphere vs elites). Recycling & austerity mandatory. Elimination of states | Extensive geoengineering & desalination. Online economy & on-demand manufacturing dominates. Widespread escape via Augmented reality |
| C3                   | Tension between energy, government & community. Social isolation & asymmetry. Catastrophic even starts community transformation                  | Shortages hasten changing economy but doesn't short cut collapse. Depression & rights crisis. Class warfare, control maintained via microchip ID to access services.     | Climate change & shortages drive radical shift in identity & consumption (urban production)                                       | Climate refugees. Race for extraterrestrial resources                                                                                |
| C4                   | Resource intrusive lifestyles. Paradigm clashes between haves & have-nots. Agriculture failing                                                   | Lifestyle & attitude gaps grow. Environmental refugees. Extreme ground water pollution. Increased xenophobia                                                             | More disease. Vulnerable crippled by of climate change. Resource scarcity encourages simpler living                               | Extreme inequity (biodomes vs wastelands). Population crash begins. Rich attain revolutionary techno-innovation                      |
| C5                   | Recognition of climate issues, Australia leads global economic revolution. Increased telecommuting. Regionalisation Move to polycentric families | Community gardens & sustainable revolution in production, city planning, transport. Holistic management.                                                                 | Equality for all. Wellbeing drives decision making. Marine industries & small/local production drive renewed economy.             | Multigeneration households. New attitudes & technologies support green economy.                                                      |

Table S1. Cont.

| Exmouth's Scenarios | 2015                                                                               | 2025                                                                                                                                                                                                   | 2035                                                                                                                                         | 2045                                                                                                                                         |
|---------------------|------------------------------------------------------------------------------------|--------------------------------------------------------------------------------------------------------------------------------------------------------------------------------------------------------|----------------------------------------------------------------------------------------------------------------------------------------------|----------------------------------------------------------------------------------------------------------------------------------------------|
| <b>E1</b>           | Urban rules & monopolies undermine sustainability. Aging causes loss of capability | Fixation on growth continues, at the cost of lifestyle. Regulation strangles free enterprise.                                                                                                          | Lack of foresight sees society fail to cope with change. Population pressure Overwhelms resources                                            | Widespread environmental degradation. Social cohesion & access to services lost. Pollution & consumption cripples ecosystems.                |
| <b>E2</b>           | Larger population, widespread development & industry footprint. Economy dropping   | Growing industry infrastructure covers environment. Loss of welfare, law & order. Tourism decreasing                                                                                                   | Deregulation of industry. Increased fly-in/fly-out & local reliance on welfare. Tourism lost                                                 | Large ports, oil spills & warfare over resources. Loss of flora & fauna, local jobs, & lifestyle. Service industries lost. Crime widespread. |
| <b>E3</b>           | Regulation & social attitude lead to recovery of environmental components          | Only sustainable Developments approved. Shift to preventative health, universally high levels of education, technology supports increased awareness & efficiency. Increased support for law and order. | Continually improving environment. Good economy based on balanced & well integrated mix of industries                                        | Focus now on gross national happiness                                                                                                        |
| <b>E4</b>           | Education in support of sustainability. Solid leadership & community cohesion      | Consumption & Preservatives reduced. Local production & sustainable ecosystems supported. Accountable government & corporations.                                                                       | Population pressure solved by technology, as are energy, pollution and consumption problems. Poverty redefined, wealth doesn't define status | Equality of access & informed Decision making. New social interactions & technology opportunities                                            |

## 2. Cognitive Signatures Analysis

**Table S1.** Comparison of cognitive signatures. For each construct and questions (left column) we show the mean and standard deviation for the Representative sample of the Australian population and the Focus group attendees. The right most column shows the result of the chi-square test or Kolmogorov Smirnov test for binned or continuous data, respectively. Bold values indicate statistical significance ( $p < 0.05$ ).

| Construct                              | Representative Sample of<br>the Australian Population |      | Focus Groups<br>Attendees |      | <i>p</i>                                 |
|----------------------------------------|-------------------------------------------------------|------|---------------------------|------|------------------------------------------|
|                                        | mean                                                  | std  | mean                      | std  |                                          |
| Closure                                | 2.80                                                  | 0.51 | 3.21                      | 0.50 | <b><math>1.1 \times 10^{-2} *</math></b> |
| Cognition                              | 2.59                                                  | 0.47 | 2.49                      | 0.79 | $7.9 \times 10^{-2}$                     |
| Risk                                   | 2.69                                                  | 0.55 | 2.92                      | 0.62 | $2.2 \times 10^{-1}$                     |
| Uncertainty                            | 2.10                                                  | 0.49 | 2.28                      | 1.14 | $2.8 \times 10^{-1}$                     |
| Myths of<br>Nature-Elastic             | 3.49                                                  | 0.75 | 4.03                      | 1.14 | <b><math>2.0 \times 10^{-5} *</math></b> |
| Myths of<br>Nature-Ductile             | 2.43                                                  | 0.69 | 2.41                      | 0.97 | $6.1 \times 10^{-1}$                     |
| Social Dominance<br>Orientation        | 3.81                                                  | 0.66 | 3.67                      | 0.91 | $9.2 \times 10^{-1}$                     |
| Right-Wing<br>Authoritarianism         | 2.32                                                  | 0.78 | 3.14                      | 0.83 | <b><math>7.7 \times 10^{-4} *</math></b> |
| Political Orientation                  | 2.69                                                  | 0.97 | 2.54                      | 1.02 | $7.9 \times 10^{-1}$                     |
| Time Perspective                       | 2.50                                                  | 0.65 | 2.27                      | 1.04 | <b><math>9.3 \times 10^{-4} *</math></b> |
| Climate Beliefs                        | 3.28                                                  | 0.81 | 3.71                      | 0.55 | <b><math>4.0 \times 10^{-2} *</math></b> |
| Attitude towards<br>Science            | 2.33                                                  | 0.61 | 2.35                      | 1.07 | $8.6 \times 10^{-2}$                     |
| Australia Safe                         | 2.31                                                  | 0.94 | 2.58                      | 1.25 | <b><math>2.1 \times 10^{-3} *</math></b> |
| Australia Honest                       | 2.41                                                  | 0.83 | 2.92                      | 1.10 | <b><math>4.6 \times 10^{-4} *</math></b> |
| Australia Friendly                     | 2.43                                                  | 0.86 | 2.58                      | 1.10 | $9.2 \times 10^{-2}$                     |
| Australia Skilled                      | 2.79                                                  | 1.12 | 2.83                      | 1.01 | $6.7 \times 10^{-1}$                     |
| Australia Wealthy                      | 2.53                                                  | 1.05 | 2.58                      | 1.14 | $7.9 \times 10^{-1}$                     |
| Environment<br>Commitment              | 2.26                                                  | 1.06 | 2.88                      | 1.73 | <b><math>1.9 \times 10^{-3} *</math></b> |
| Environmentalism                       | 2.42                                                  | 0.56 | 2.66                      | 1.11 | $3.0 \times 10^{-1}$                     |
| Trust in Scientists                    | 2.12                                                  | 0.81 | 1.67                      | 0.87 | <b><math>1.9 \times 10^{-3} *</math></b> |
| Trust in Environmental<br>Organisation | 2.79                                                  | 1.05 | 2.21                      | 1.22 | <b><math>2.8 \times 10^{-5} *</math></b> |

**Table S2.** *Cont.*

|                                                   | Representative Sample of<br>the Australian Population |       | Focus Groups<br>Attendees |           |                        |
|---------------------------------------------------|-------------------------------------------------------|-------|---------------------------|-----------|------------------------|
| Trust in Federal<br>Government                    | 3.39                                                  | 1.03  | 3.42                      | 0.83      | $4.5 \times 10^{-1}$   |
| Trust in Local<br>Government                      | 3.32                                                  | 0.99  | 3.50                      | 1.14      | $2.3 \times 10^{-1}$   |
| Trust in Friends &<br>Family                      | 2.58                                                  | 0.94  | 2.75                      | 0.85      | $1.6 \times 10^{-1}$   |
| Trust in Community                                | 2.86                                                  | 0.77  | 3.00                      | 0.78      | $8.4 \times 10^{-1}$   |
| Trust in News                                     | 3.34                                                  | 0.95  | 3.42                      | 1.25      | $3.9 \times 10^{-1}$   |
| Strength of<br>Anthropogenic impact<br>on Climate | 51.38                                                 | 29.39 | 73.13                     | 27.5<br>0 | $4.4 \times 10^{-3} *$ |
| Age                                               | 2.82                                                  | 1.10  | 3.21                      | 0.93      | $2.3 \times 10^{-2} *$ |
| Gender                                            | 1.52                                                  | 0.50  | 2.04                      | 1.23      | $5.5 \times 10^{-1}$   |

### 3. Focus Group Attendees

**Table S2.** Focus groups attendance at different locations.

| Location  | Females | Males | Total |
|-----------|---------|-------|-------|
| Hobart    | 23      | 16    | 39    |
| Melbourne | 20      | 22    | 42    |
| Canberra  | 14      | 20    | 34    |
| Exmouth   | 6       | 3     | 9     |
|           | 63      | 61    | 124   |
